# Supplementary material for: Casiopeina II-gly acts on lncRNA MALAT1 by miR-17-5p to inhibit FZD2 expression via the Wnt signaling pathway during the treatment of cervical carcinoma
Source: PubMed Central journal article supplement — Oncol Rep. 2019 Aug 8;42(4):1365–79. doi: 10.3892/or.2019.7268 (PMC6718102; doi:10.3892/or.2019.7268), 2019-08-08
Supplement: Supplementary_Data.pdf [file Supplementary_Data.pdf]

Table SI. Chemical characterization.

| Drug       | Color | E. A. <sup>a</sup> (%N; %C; %H)         | Formula <sup>b</sup>                                                         | FW (g/mol) | $\mu_{\text{eff}}$ (BM) <sup>c</sup> | Cond. ( $\mu\text{S}$ ) <sup>d</sup> |
|------------|-------|-----------------------------------------|------------------------------------------------------------------------------|------------|--------------------------------------|--------------------------------------|
| Cas-II-gly | Blue  | 12.60; 43.37; 4.62 (12.62; 43.29; 4.54) | $\text{CuC}_{16}\text{H}_{16}\text{N}_4\text{O}_5 \cdot 2\text{H}_2\text{O}$ | 443.9      | 1.78                                 | 38.6                                 |

<sup>a</sup>E. A. elemental analysis experimental data (calculated data); <sup>b</sup>Formulated per metal ion; <sup>c</sup>Magnetic effective moment; <sup>d</sup>Conductivity 1 mM ethanolic solution at 298 K. Cas-II-gly, Casiopeina II-gly.
